# Supplementary material
Source: PubMed Central journal article supplement (PMC4793570)
Supplement: dund015657.ww1_default.pdf [file dund015657.ww1_default.pdf]

Appendix. Full regression model results from discrete survival analyses

|                                                                  | Table 2 Disability onset outcome<br>(n=1680) |                                        | Table 3 Disability progression<br>outcome (n=1814) |                                        |
|------------------------------------------------------------------|----------------------------------------------|----------------------------------------|----------------------------------------------------|----------------------------------------|
|                                                                  | Light activity<br>time analysis              | Moderate-<br>vigorous<br>time analysis | Light activity<br>time analysis                    | Moderate-<br>vigorous time<br>analysis |
|                                                                  | Hazard Ratio                                 | Hazard Ratio                           | Hazard Ratio                                       | Hazard Ratio                           |
| Quartile of Light Activity                                       |                                              |                                        |                                                    |                                        |
| Q1 (least, reference)                                            | -                                            | -                                      | -                                                  | -                                      |
| Q2                                                               | 0.64*                                        | -                                      | 0.61*                                              | -                                      |
| Q3                                                               | 0.51*                                        | -                                      | 0.54*                                              | -                                      |
| Q4 (most)                                                        | 0.67*                                        | -                                      | 0.60*                                              | -                                      |
| Quartile of MV Activity                                          |                                              |                                        |                                                    |                                        |
| Q1 (least, reference)                                            | -                                            | -                                      | -                                                  | -                                      |
| Q2                                                               | -                                            | 0.57*                                  | -                                                  | 0.68                                   |
| Q3                                                               | -                                            | 0.63                                   | -                                                  | 0.66                                   |
| Q4 (most)                                                        | -                                            | 0.38*                                  | -                                                  | 0.41*                                  |
| Socio-economic Factors                                           |                                              |                                        |                                                    |                                        |
| Age 55-64                                                        | 0.70                                         | 0.72                                   | 0.77                                               | 0.78                                   |
| 65+                                                              | 0.79                                         | 0.77                                   | 0.84                                               | 0.83                                   |
| African American                                                 | 0.88                                         | 0.92                                   | 0.94                                               | 0.97                                   |
| Other race/ethnicity                                             | 1.04                                         | 1.06                                   | 0.70                                               | 0.74                                   |
| Male Gender                                                      | 1.21                                         | 1.24                                   | 1.23                                               | 1.25                                   |
| Education> 13 Years                                              | 1.59                                         | 1.66                                   | 1.58                                               | 1.63                                   |
| Income > \$50,000                                                | 1.10                                         | 1.09                                   | 1.04                                               | 1.04                                   |
| Unknown Income                                                   | 0.80                                         | 0.82                                   | 0.67                                               | 0.67                                   |
| Health Factors                                                   |                                              |                                        |                                                    |                                        |
| Overweight: BMI 25-29.9                                          | 1.27                                         | 1.28                                   | 1.19                                               | 1.18                                   |
| Obese: BMI ≥30                                                   | 0.92                                         | 0.96                                   | 0.95                                               | 0.98                                   |
| Cancer                                                           | 0.60                                         | 0.65                                   | 0.72                                               | 0.77                                   |
| Cerebrovascular disease                                          | 1.82                                         | 1.87                                   | 1.69                                               | 1.69                                   |
| Congestive heart failure                                         | 1.45                                         | 1.35                                   | 1.51                                               | 1.53                                   |
| Diabetes                                                         | 0.95                                         | 0.88                                   | 1.10                                               | 1.06                                   |
| Gastrointestinal disease                                         | 1.16                                         | 1.17                                   | 0.94                                               | 0.94                                   |
| Pulmonary disease                                                | 1.31                                         | 1.36                                   | 1.37                                               | 1.37                                   |
| Kidney problems                                                  | 0.39                                         | 0.42                                   | 0.32                                               | 0.33                                   |
| Myocardial infarction                                            | 1.79                                         | 1.78                                   | 0.94                                               | 0.84                                   |
| Rheumatic disease other than OA                                  | 0.53                                         | 0.52                                   | 0.79                                               | 0.80                                   |
| Vascular disease                                                 | 0.77                                         | 0.79                                   | 1.10                                               | 1.10                                   |
| Depressive Symptom Score <sup>a</sup> (per unit)                 | 1.04*                                        | 1.04*                                  | 1.04*                                              | 1.04*                                  |
| Current Smoker                                                   | 0.68                                         | 0.67                                   | 0.72                                               | 0.71                                   |
| Function: gait speed feet/second                                 | 0.76                                         | 0.76                                   | 0.84                                               | 0.84                                   |
| Knee osteoarthritis severity <sup>b</sup> K/L1                   | 0.97                                         | 0.91                                   | 0.93                                               | 0.90                                   |
| K/L2                                                             | 1.16                                         | 1.09                                   | 1.20                                               | 1.17                                   |
| K/L3                                                             | 1.31                                         | 1.20                                   | 1.28                                               | 1.23                                   |
| K/L4                                                             | 0.81                                         | 0.75                                   | 0.80                                               | 0.78                                   |
| Knee Symptoms <sup>c</sup>                                       | 1.29                                         | 1.23                                   | 1.28                                               | 1.23                                   |
| Prior Knee Injury                                                | 0.82                                         | 0.85                                   | 0.80                                               | 0.81                                   |
| Knee pain <sup>d</sup> (per unit)                                | 1.03                                         | 1.03                                   | 1.02                                               | 1.02                                   |
| Other lower extremity <sup>e</sup> pain, aching, or<br>stiffness | 1.50 *                                       | 1.50*                                  | 1.45*                                              | 1.43*                                  |
| Physical activity                                                |                                              |                                        |                                                    |                                        |
| Light activity minutes/day                                       | -                                            | 1.00                                   | -                                                  | 1.00                                   |
| Moderate-vigorous activity minutes/day                           | 0.98*                                        | -                                      | 0.98*                                              | -                                      |

\* p-value<.05

<sup>a</sup> Center for Epidemiological Studies Depression score

<sup>b</sup> Highest Kellgren-Lawrence grade of both knees

<sup>c</sup> Knee symptoms based on report of pain, aching, or stiffness most days in month past 12 months.

<sup>d</sup> Western Ontario and McMaster University OA Index pain score;

<sup>e</sup> Hip, ankle, or foot.
